# Supplementary material for: Ab initio simulations of defect-based magnetism: the case of CoSi nanowires
Source: Royal Society of Chemistry journal article supplement (doi:10.1039/c5ra21631a), 2016-01-01
Supplement: c5ra21631a1.pdf [file c5ra21631a1.pdf]

# Supplemental Materials for “**Ab initio simulations of defect-based magnetism: The case of CoSi nanowires**”

Tai-Kang Liu<sup>1</sup>, Shan-Haw Chiou<sup>2</sup>, Johan van Lierop<sup>3\*</sup> and Chuenhou (Hao) Ouyang<sup>1\*</sup>

<sup>1</sup> Department of Materials Science and Engineering, National Tsing Hua University, Hsinchu, Taiwan 300, Republic of China

<sup>2</sup> Material and Chemical Research Laboratories and Nanotechnology Research Center, Industrial Technology Research Institute, Hsinchu, Taiwan 310, Republic of China

<sup>3</sup> Department of Physics and Astronomy, University of Manitoba, Winnipeg, MB, R3T 2N2, Canada

<sup>1\*</sup> [houyang@mx.mthu.edu.tw](mailto:houyang@mx.mthu.edu.tw)

<sup>3\*</sup> [Johan.van.Lierop@umanitoba.ca](mailto:Johan.van.Lierop@umanitoba.ca)

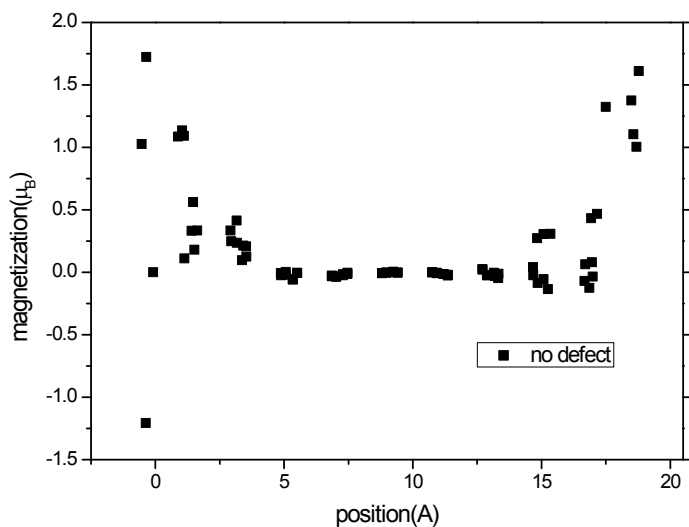

Figure S1. Distribution of simulated moment of Co atoms around SiO<sub>2</sub>/CoSi (without ordered vacancies)/SiO<sub>2</sub> interface and the chosen three Co atoms with different distances to the interface based on LDA+U for single k-point and total drift force less than 0.17 eV/Å (<https://www.materialsproject.org/materials/mp-18748/GGA+U>, Co 3.32eV, the Ceder's Materialsproject home page)

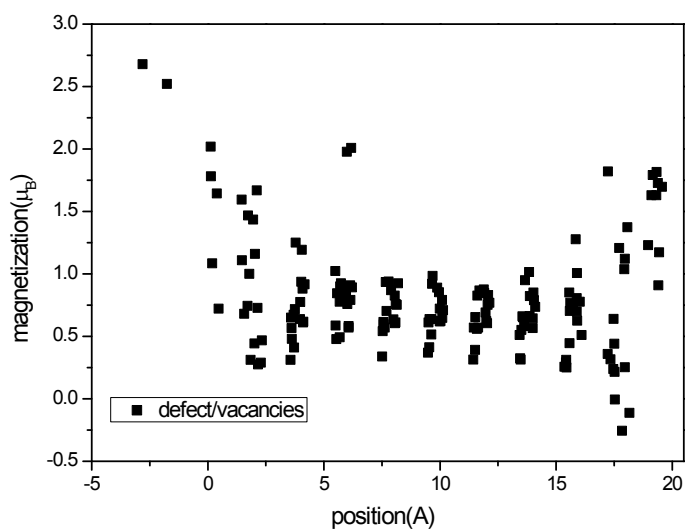

Figure S2. Distribution of simulated moment of Co atoms around SiO<sub>2</sub>/CoSi (with ordered vacancies)/SiO<sub>2</sub> interface and the chosen three Co atoms with different distance to the interface based on LDA+U

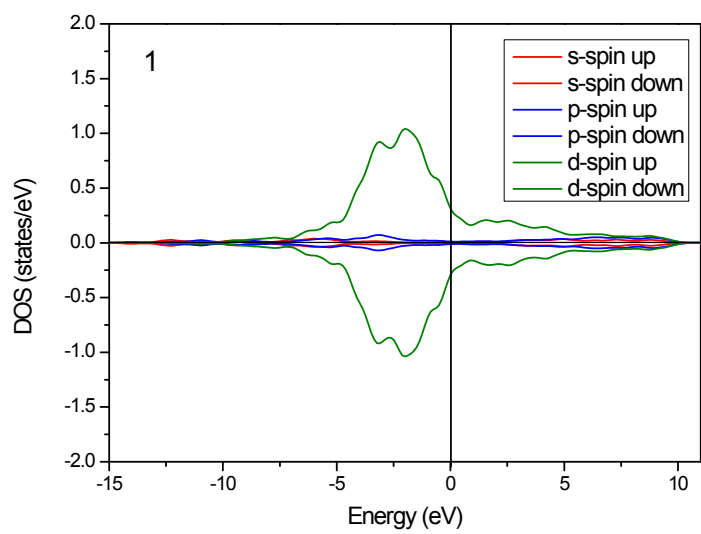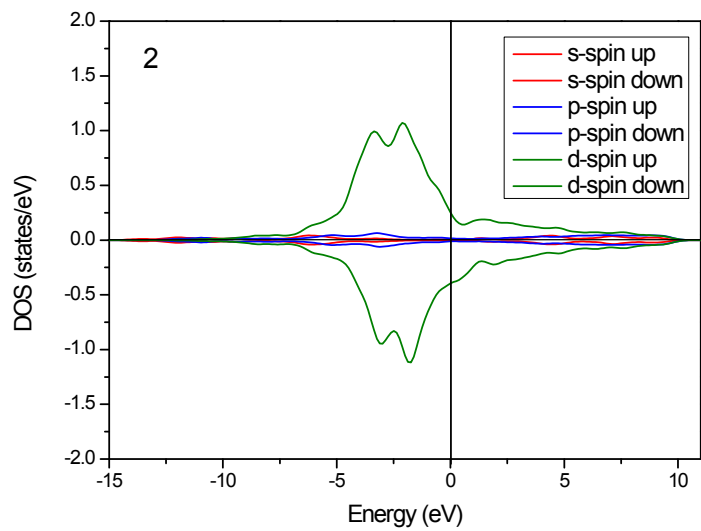

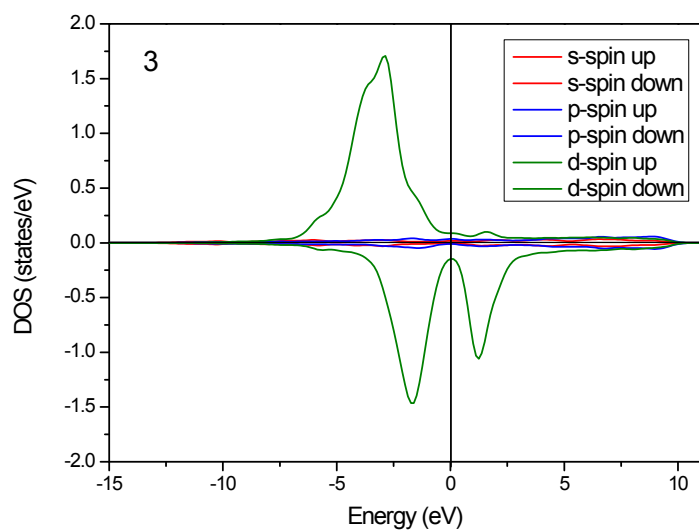

Figure S3. Corresponding DOS's of Fig.3 (LDA+U)

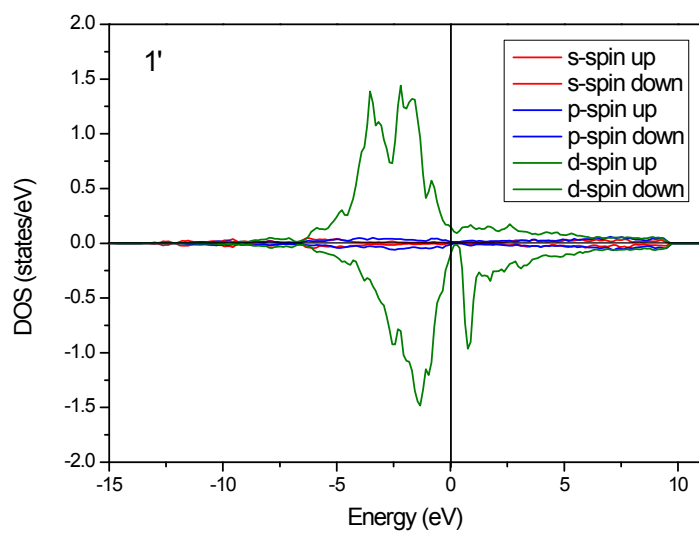

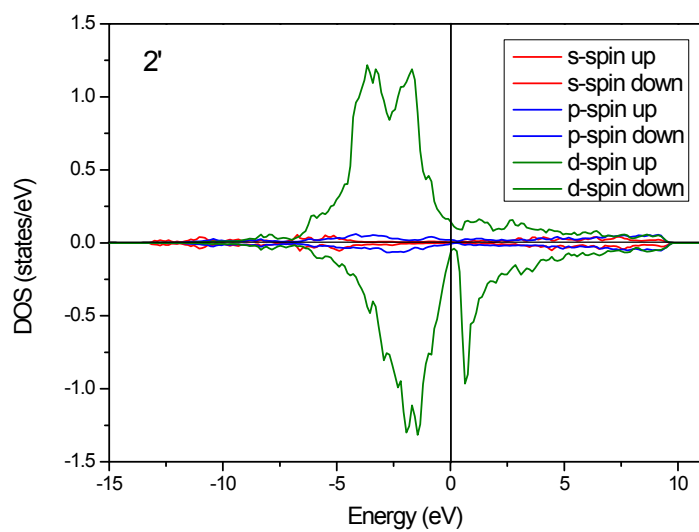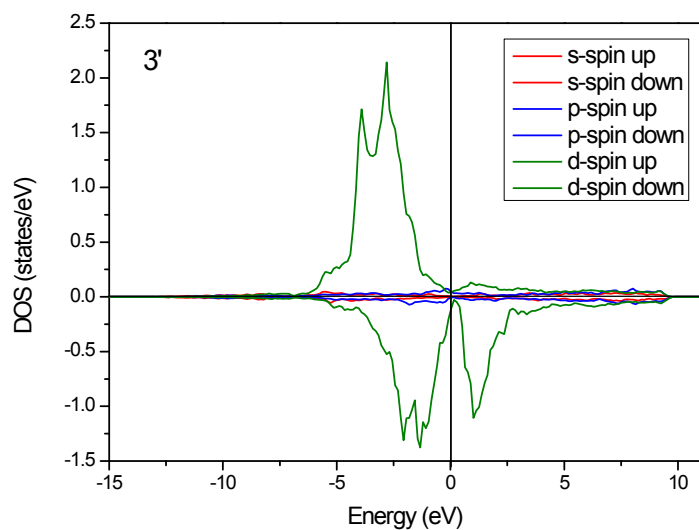

Figure S4. Corresponding DOS's of Fig. 4 (LDA+U), which become less symmetric due to existence of vacancies.

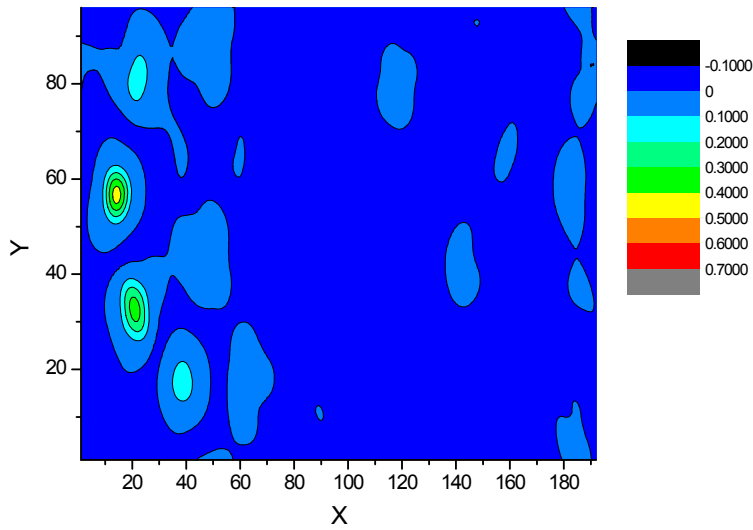

Figure S5. Contour of the electron density for spin-up minus spin-down at the 2' atom layer. (Y along [211] in the nanowire(long axis) and X along the inward direction in Fig. 4 in unit of Å)

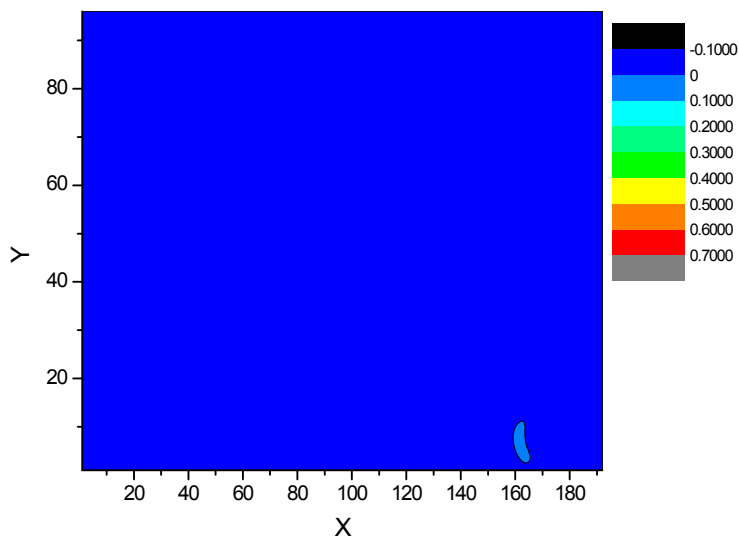

Figure S6. Contour of the electron density for spin-up minus spin-down at the 1' atom layer(Y along [211] in the nanowire(long axis) and X along the inward direction in Fig. 4 in unit of Å)
